# Supplementary material
Source: Research Square preprint supplement (doi:10.21203/rs.3.rs-8912330/v1)

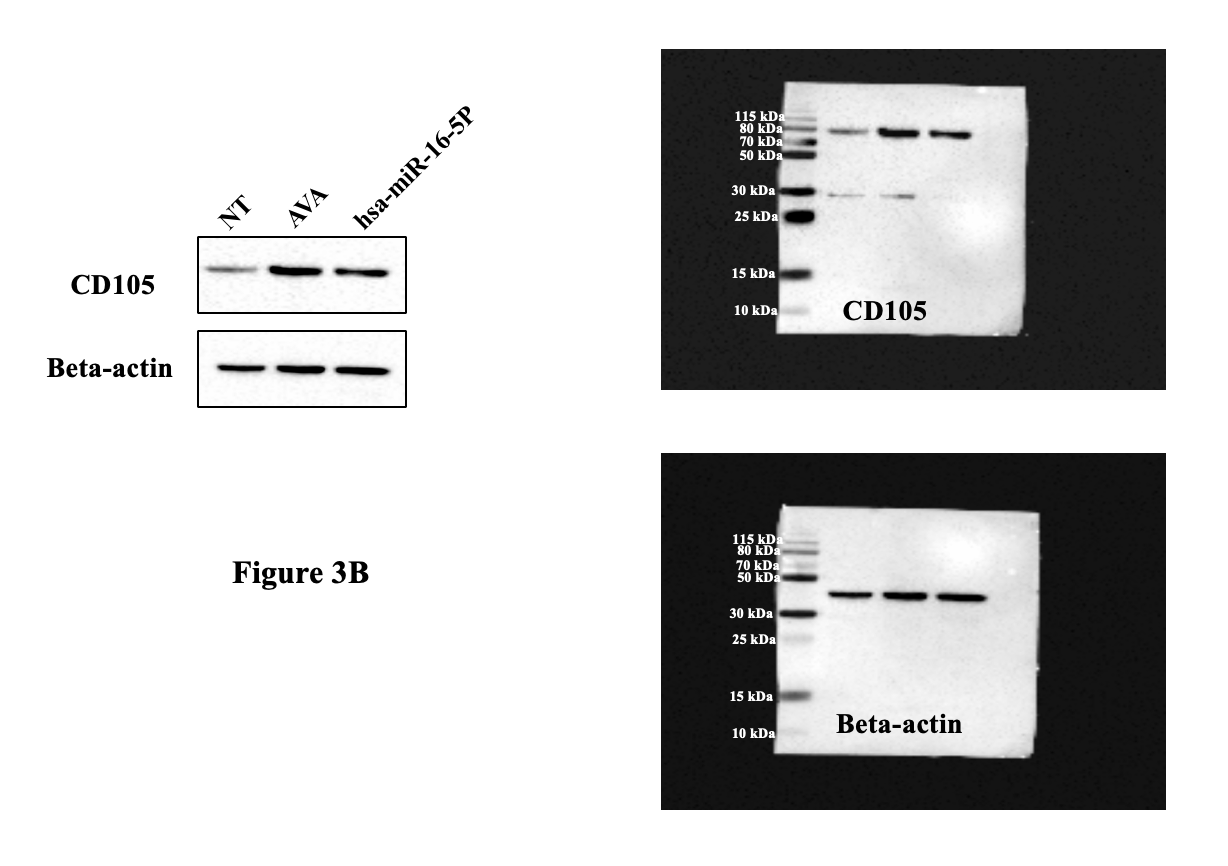


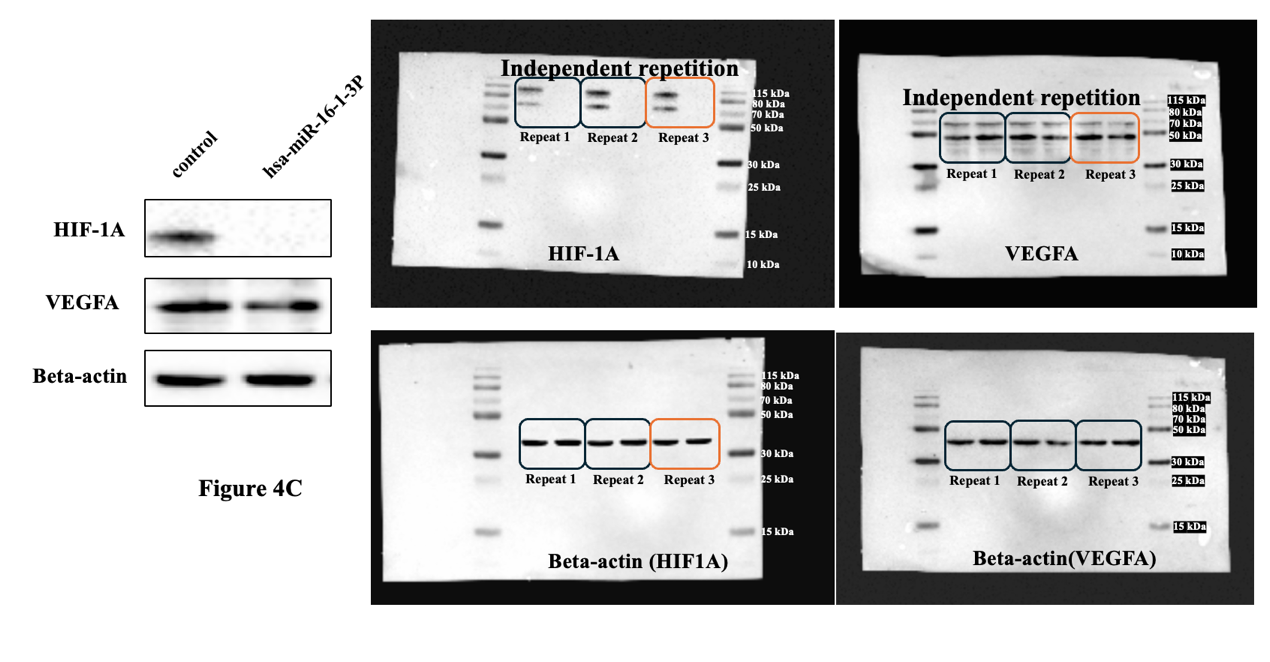


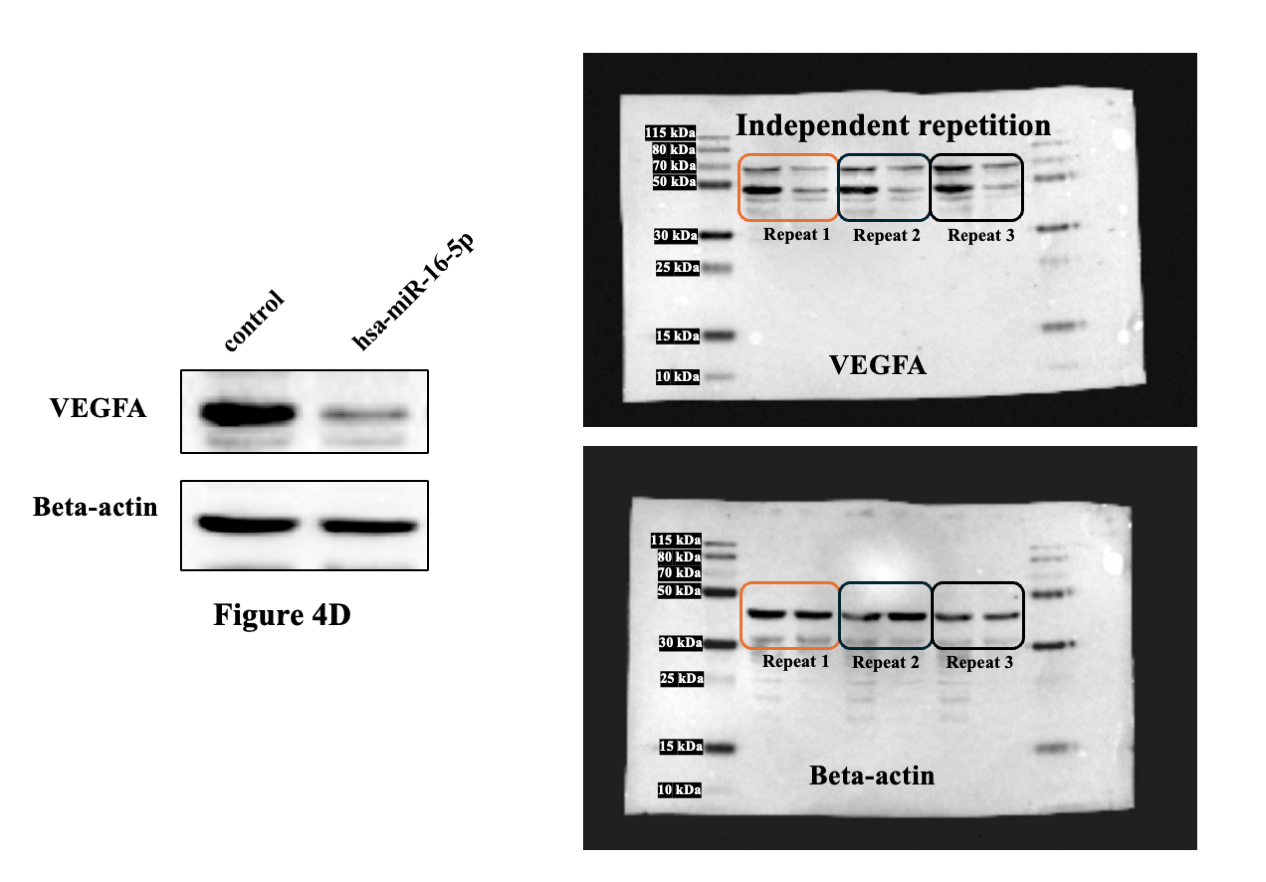


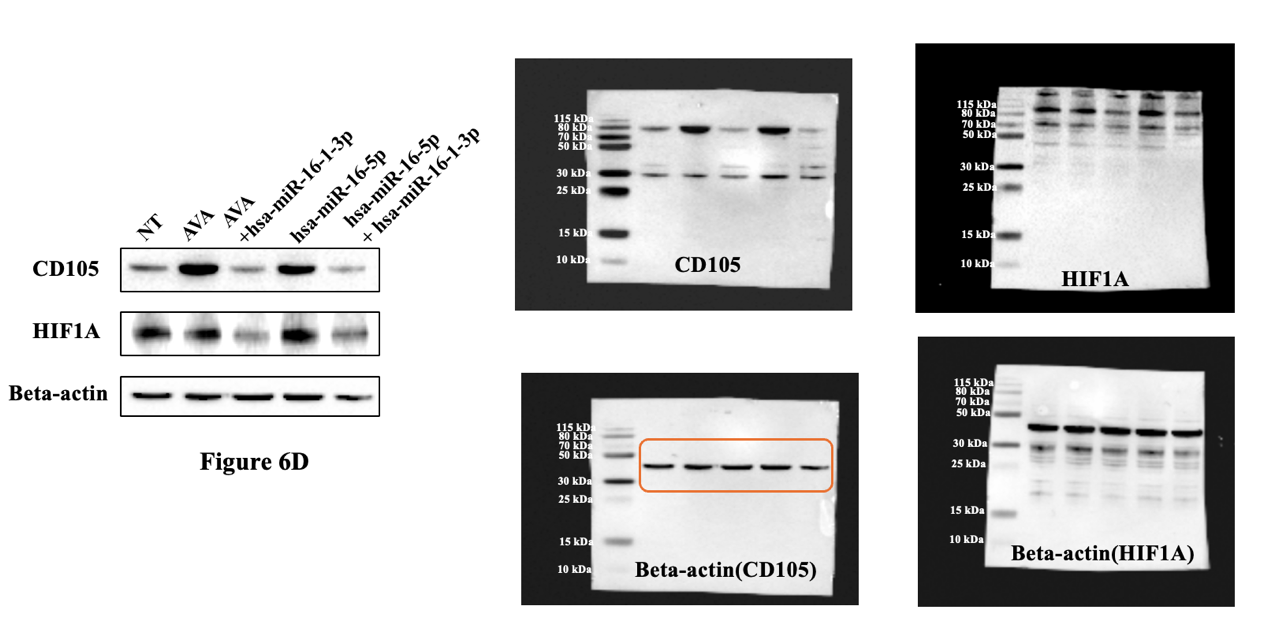


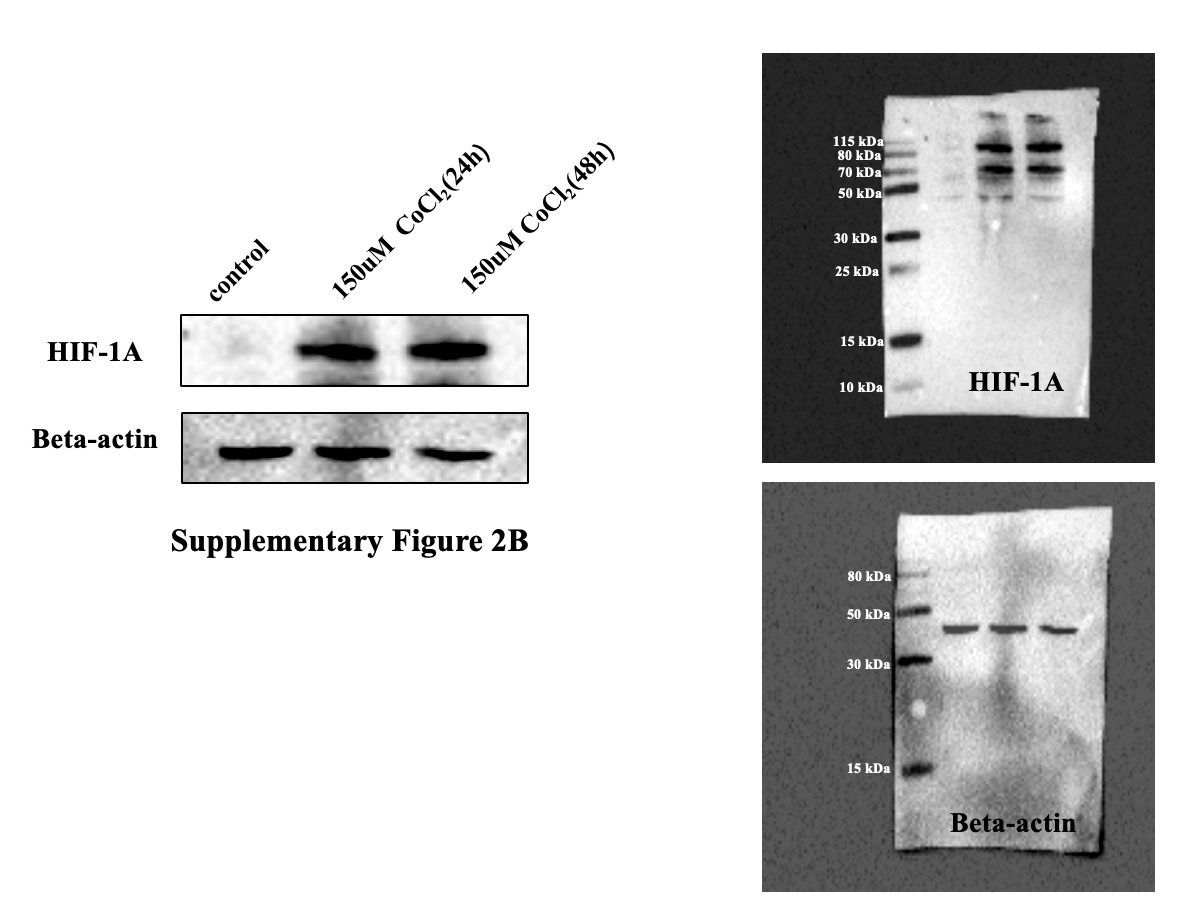


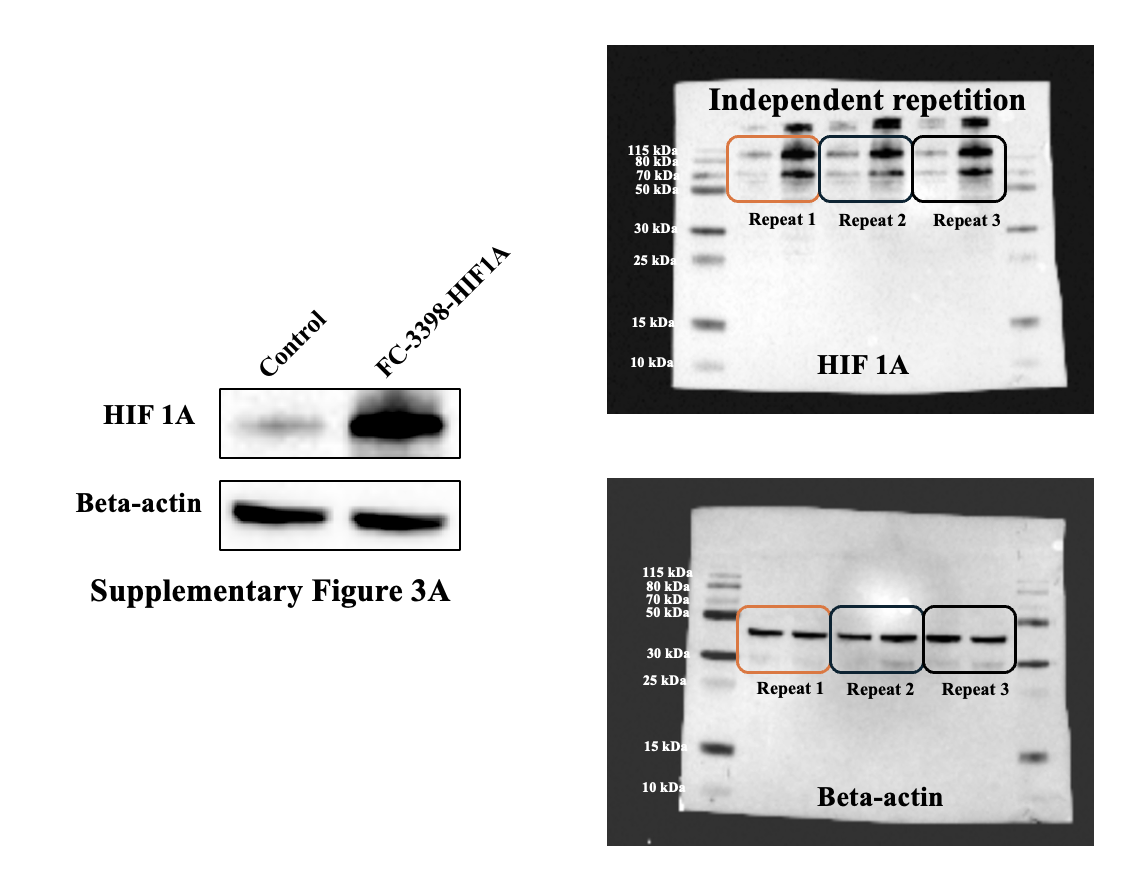


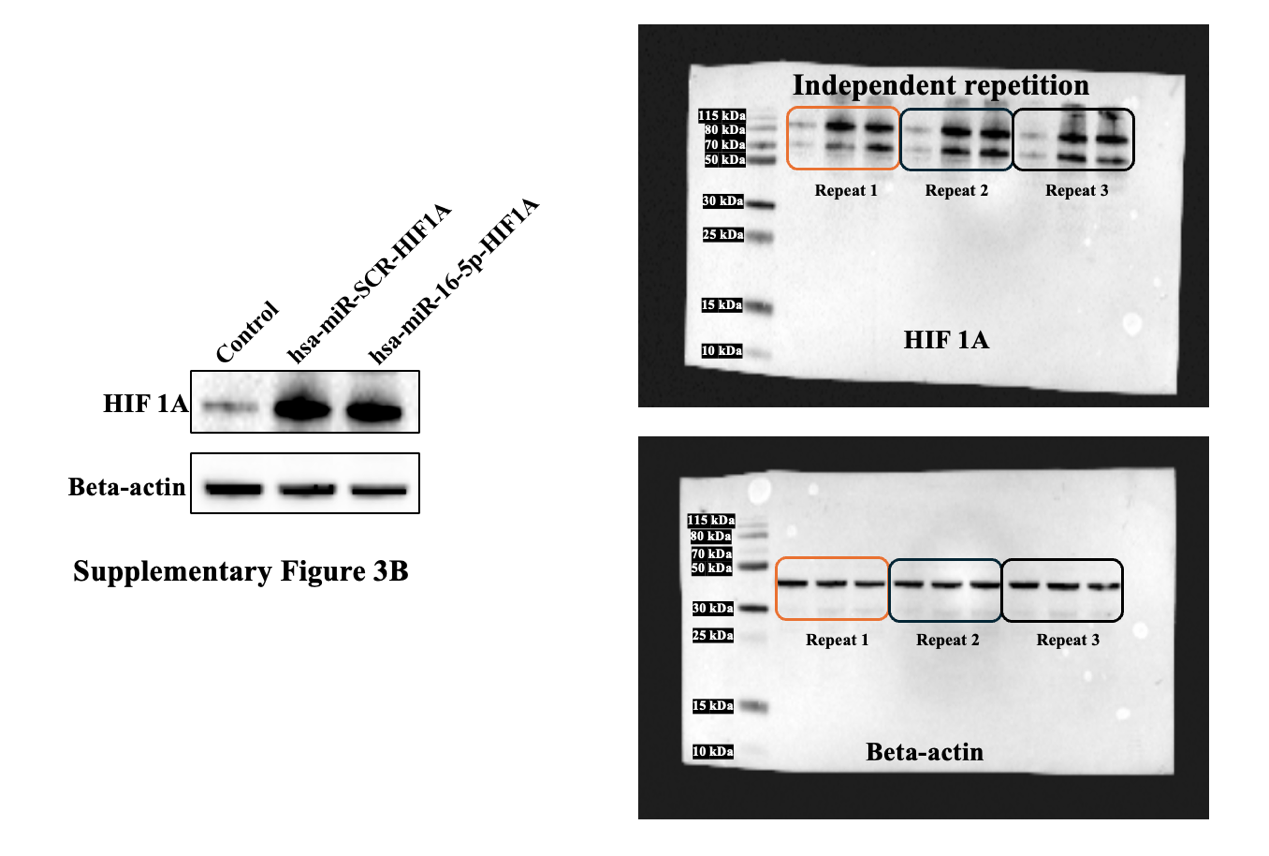

Supplement: Supplementary file 2 [file d3c44db61fe7a22369faad13.docx]
